# Supplementary material for: Dietary Intake of High-Protein Foods and Other Major Foods in Meat-Eaters, Poultry-Eaters, Fish-Eaters, Vegetarians, and Vegans in UK Biobank
Source: PubMed Central journal article supplement (PMC5748767; doi:10.3390/nu9121317), 2017-12-02
Supplement: nutrients-09-01317-s001.pdf [file nutrients-09-01317-s001.pdf]

**Supplementary Table S1: Individual food items within each major protein source food group**

| Food group                      | Individual food items                                                                                                                                                       |
|---------------------------------|-----------------------------------------------------------------------------------------------------------------------------------------------------------------------------|
| Red meat                        | beef; lamb; pork                                                                                                                                                            |
| Processed meat                  | sausage; bacon; ham                                                                                                                                                         |
| Poultry                         | crumbed chicken; chicken/poultry                                                                                                                                            |
| Oily fish                       | oily fish                                                                                                                                                                   |
| Non-oily fish                   | white fish; breaded fish; battered fish; tinned tuna                                                                                                                        |
| Legumes/pulses                  | baked beans; pulses; hummus                                                                                                                                                 |
| Vegetarian protein alternatives | soy burgers/sausages; tofu; Quorn; other vegetarian alternatives                                                                                                            |
| Nuts                            | salted peanuts; unsalted peanuts; salted other nuts; unsalted other nuts                                                                                                    |
| Cheese                          | low fat hard cheese; hard cheese; soft cheese; blue cheese; low fat cheese spread; cheese spread; cottage cheese; feta cheese; mozzarella cheese; goat cheese; other cheese |
| Yogurt                          | full fat yogurt; low fat yogurt                                                                                                                                             |
| Dairy milk                      | whole milk; semi-skimmed milk; skimmed milk; powdered milk; goat/sheep milk                                                                                                 |
| Plant milk                      | soya milk with calcium; soya milk without calcium; rice/oat other vegetable milk                                                                                            |
| Eggs                            | whole eggs; omelette; eggs disaggregated from mayonnaise in egg sandwiches                                                                                                  |

**Supplementary Table S2. Food items within each other food group**

| Food group                        | Individual items                                                                                                                                                                                                                                                                                                                                                                                               |
|-----------------------------------|----------------------------------------------------------------------------------------------------------------------------------------------------------------------------------------------------------------------------------------------------------------------------------------------------------------------------------------------------------------------------------------------------------------|
| Fruit                             | stewed/cooked fruit; prunes; other dried fruit; mixed fruit; apple; banana; berries; cherries; grapefruit; grapes; mango; melon; orange; orange-like small fruits; peach, nectarine; pear; pineapple; plum; other fruit                                                                                                                                                                                        |
| Vegetables                        | mixed vegetables; vegetable pieces; coleslaw; mixed side salad; avocado; broad beans; green beans; beetroot; broccoli; butternut squash; cabbage; carrots; cauliflower; celery; courgette; cucumber; garlic; leeks; lettuce; mushrooms; onion; parsnip; peas; peppers; spinach; sprouts; sweetcorn; sweet potatoes; tomatoes, fresh; tomatoes, cooked or tinned; turnip or swede; watercress; other vegetables |
| Potatoes - baked/boiled or mashed | potatoes (baked, boiled); potatoes (mashed)                                                                                                                                                                                                                                                                                                                                                                    |
| Potatoes - fried/roast            | potatoes (fried, chips, wedges, roast)                                                                                                                                                                                                                                                                                                                                                                         |
| White pasta                       | white pasta                                                                                                                                                                                                                                                                                                                                                                                                    |

|                            |                                                                                                                                                                |
|----------------------------|----------------------------------------------------------------------------------------------------------------------------------------------------------------|
| Wholemeal pasta            | wholemeal pasta                                                                                                                                                |
| White rice                 | white rice                                                                                                                                                     |
| Brown rice                 | brown rice                                                                                                                                                     |
| Sliced white bread         | sliced white bread                                                                                                                                             |
| Sliced brown bread         | sliced brown bread                                                                                                                                             |
| Sliced wholemeal bread     | sliced wholemeal bread                                                                                                                                         |
| Other bread                | naan bread; garlic bread; crackers, crispbread, rice cakes, corn cakes; oat cakes; other bread                                                                 |
| Porridge                   | porridge, hot oat cereal (e.g. Ready Brek)                                                                                                                     |
| Breakfast cereal           | muesli; sweetened oat crunch type cereal; other sweetened cereals; plain cereals; bran cereals; wholewheat cereals; other cereals                              |
| Ice-cream                  | ice-cream                                                                                                                                                      |
| Milk desserts              | custard, rice pudding, semolina pudding, blancmange; other milk based desserts (e.g. mousse, tiramisu, crème caramel); cheesecake                              |
| Soya desserts              | soya ice cream, soya yogurt, other soya dessert                                                                                                                |
| Other desserts             | fruit cake; cake; doughnuts; sponge pudding; other dessert                                                                                                     |
| Chocolate                  | chocolate bars, white chocolate, milk chocolate, dark chocolate, chocolate sweets                                                                              |
| Biscuits/cereal bars       | chocolate covered biscuits; chocolate biscuits; sweet biscuits; cereal bars; other sweet snack                                                                 |
| Pure fruit/vegetable juice | pure orange juice; pure grapefruit juice; other pure fruit/vegetable juice                                                                                     |
| Cordial/squash             | fruit drinks, J20, squash or cordial                                                                                                                           |
| Sugar sweetened beverages  | carbonated (fizzy) drinks                                                                                                                                      |
| Tea                        | standard tea (e.g. Tetley, PG Tips, Assam, Darjeeling); rooibos/redbush tea (e.g. Tick Tock); green tea; herbal or fruit tea (infusion); other tea or infusion |
| Coffee                     | instant; filter/americano/cafetiere; cappuccino; latte; espresso; other coffee drinks                                                                          |
| White wine                 | white wine                                                                                                                                                     |
| Red wine                   | red wine                                                                                                                                                       |
| Beer/cider                 | beer lager or cider                                                                                                                                            |
